# Supplementary material
Source: Springer Nature journal article supplement (https://www.springermedizin.de/resource/supplementary/13054_2012_691_MOESM6_ESM.pdf/9709018)

**ACE activity in BALF (FU)**

**10000**  
**8000**  
**6000**  
**4000**  
**2000**  
**0**

**LoP-C**

**LoP-Met**

**HiP-C**

**HiP-Met**

**\***

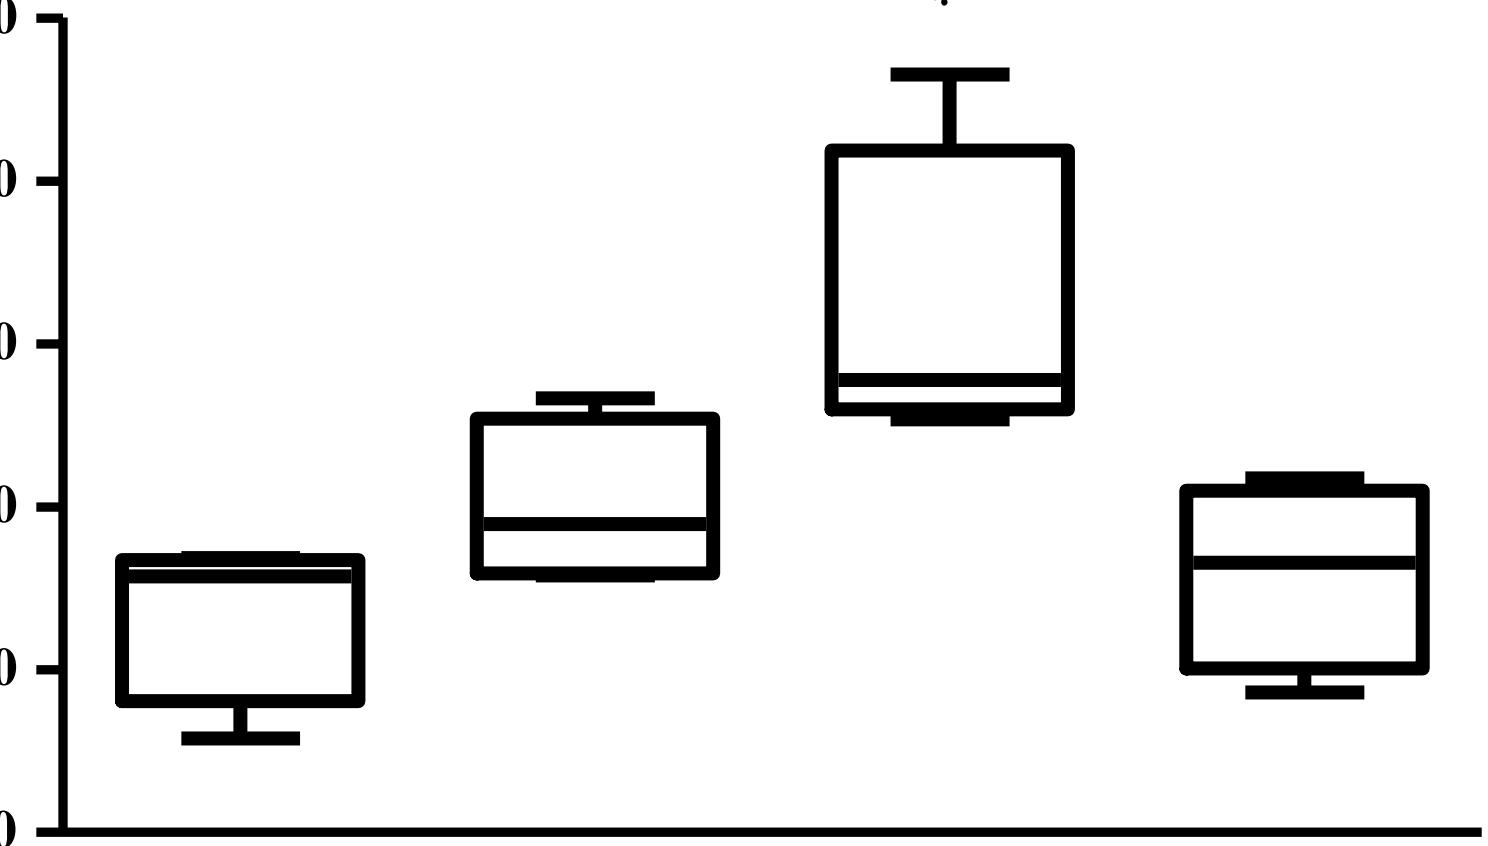

Supplement: MOESM6 [file 9709018]
